# Supplementary material for: The association between vital signs and clinical outcomes in emergency department patients of different age categories
Source: PubMed Central journal article supplement — Emerg Med J. 2022 Jan 11;39(12):903–11. doi: 10.1136/emermed-2020-210628 (PMC9691829; doi:10.1136/emermed-2020-210628), 2022-01-11
Supplement: emermed-2020-210628supp002.pdf [file emermed-2020-210628supp002.pdf]

## SUPPLEMENTARY FILE 2

The following variables were calculated or modified:

- Triage levels were considered equal between hospitals. Non-urgent triage levels (blue and green) were merged into one triage level, because of the low number of ED patients and events in the triage level blue.
- The Manchester Triage System (MTS) was used in the tertiary care centre, and consisted of 51 possible chief complaints. The Dutch Triage Standard (NTS) consisted of 50 possible triage chief complaints and was used in the two urban hospitals. The MTS and NTS were merged into one chief complaints list. The MTS, NTS and the merged chief complaints list are shown below. If chief complaints did not match, a new chief complaint was made. In total the merged list contained 51 different chief complaints. The top ten chief complaints were used in the present study to adjust the primary associations of interest (feeling unwell; abdominal pain; dyspnea; chest pain; extremity problems; collapse; trauma; palpitations; wounds; headache, and a miscellaneous category containing all the other chief complaints.
- Treating specialty was categorised to minimize the number of categories and use as potential confounder: surgical (i.e. surgery, orthopaedics, ophthalmology, urology, ear-nose-throat), medical (internal medicine, cardiology, neurology, gastroenterologist, psychiatry, and remaining specialties) and emergency medicine if no other specialty had been involved. Specialities were assigned before ED treatment during patient registration. Self-referred patients and critically ill patients are generally assigned to the Emergency Medicine. If a patient is referred by a general practitioner, he/she is often referred to a specific specialty.

| Merged chief complaints<br>(N=51) | MTS chief complaints<br>(N=51)                         | NTS chief complaints<br>(N=50)                         |
|-----------------------------------|--------------------------------------------------------|--------------------------------------------------------|
| Abdominal pain                    | Abdominal pain in adults<br>Abdominal pain in children | Abdominal pain in adults<br>Abdominal pain in children |
| Abscesses & local infections      | Abscesses and local infections                         |                                                        |
| Allergy, bites & stings           | Allergy<br>Bites and stings                            | Allergic reaction and stings                           |
| Apparently drunk                  | Apparently drunk                                       |                                                        |
| Assault                           | Assault                                                |                                                        |
| Asthma                            | Asthma                                                 |                                                        |
| Back pain                         | Back pain                                              | Back pain                                              |
| Behaving strangely & suicidal     | Behaving strangely                                     | Behaving strangely or suicidal                         |
| Breast infection                  |                                                        | Breast infection                                       |
| Burns & scalds                    | Burns and scalds                                       | Burns and scalds                                       |
| Chest pain                        | Chest pain                                             | Chest pain                                             |
| Collapse                          | Collapsed adult                                        | Collapse<br>Dizziness                                  |

**SUPPLEMENTARY FILE 2**

|                                              |                                 |                                              |
|----------------------------------------------|---------------------------------|----------------------------------------------|
| Constipation                                 |                                 | Constipation                                 |
| Coughing                                     |                                 | Coughing                                     |
| Crying baby                                  | Crying baby                     |                                              |
| Dental problems                              | Dental problems                 | Dental problems                              |
| Diabetes                                     | Diabetes                        | Diabetes                                     |
| Diarrhea & vomiting                          | Diarrhea and vomiting           | Diarrhea                                     |
|                                              |                                 | Vomiting                                     |
| Dyspnea                                      | Shortness of breath in adults   | Shortness of breath                          |
|                                              | Shortness of breath in children |                                              |
| Ear problems                                 | Ear problems                    | Ear problems                                 |
| Exposure to chemicals                        | Exposure to chemicals           |                                              |
| Extremity problems                           | Limb problems                   | Arm problems                                 |
|                                              |                                 | General/limb trauma                          |
|                                              |                                 | Leg problems                                 |
| Eye problems                                 | Eye problems                    | Eye problems                                 |
| Facial problems                              | Facial problems                 | Facial trauma                                |
|                                              |                                 | Nosebleed                                    |
| Falls                                        | Falls                           |                                              |
| Feeling unwell                               | Unwell adult                    | Fever in adults                              |
|                                              | Unwell child                    | Fever in children                            |
|                                              |                                 | Neurological failure                         |
|                                              |                                 | Unwell adult                                 |
|                                              |                                 | Unwell child                                 |
| Fits                                         | Fits                            | Fits                                         |
| Foreign body                                 | Foreign body                    | Foreign body                                 |
| Gastro-intestinal (GI) bleeding              | Gastro-intestinal (GI) bleeding |                                              |
| Genital problems                             | Testicular pain                 | Genital problems                             |
| Headache                                     | Headache                        | Headache                                     |
| Implantable Cardioverter Defibrillator (ICD) |                                 | Implantable Cardioverter Defibrillator (ICD) |
| Irritable child                              | Irritable child                 |                                              |
| Limping child                                | Limping child                   |                                              |
| Major incidents – primary                    | Major incidents – primary       |                                              |
| Mental illness                               | Mental illness                  |                                              |
| Near-drowning                                |                                 | Near-drowning                                |
| Neck pain                                    | Neck pain                       | Neck problems                                |
|                                              |                                 | Neck trauma                                  |
| Overdose & poisoning                         | Overdose and poisoning          | Poisoning                                    |
| Palpitations                                 | Palpitations                    | Palpitations                                 |
| Per vaginum (VP) bleeding                    | Per vaginum (VP) bleeding       | Per vaginum (VP) bleeding                    |
| Pregnancy                                    | Pregnancy                       | Childbirth                                   |
| Rashes                                       | Rashes                          | Rashes                                       |
| Rectal problems                              |                                 | Rectal problems                              |
| Self-harm                                    | Self-harm                       |                                              |
| Sexually acquired infection                  | Sexual acquired infection       |                                              |
| Throat problems                              | Sore throat                     | Throat problems                              |
| Trauma                                       | Head injury                     | Head trauma                                  |
|                                              | Torso injury                    | Thorax trauma                                |
|                                              | Major trauma                    | Abdominal trauma                             |
|                                              |                                 | Back trauma                                  |
| Urinary problems                             | Urinary problems                | Urinary problems                             |
| Worried parent                               | Worried parent                  |                                              |
| Wounds                                       | Wounds                          | Wounds                                       |

Abbreviations: MTS=Manchester Triage System, NTS= Dutch Triage Standard, N= number
