# Supplementary material for: The association between vital signs and clinical outcomes in emergency department patients of different age categories
Source: PubMed Central journal article supplement — Emerg Med J. 2022 Jan 11;39(12):903–11. doi: 10.1136/emermed-2020-210628 (PMC9691829; doi:10.1136/emermed-2020-210628), 2022-01-11
Supplement: emermed-2020-210628supp003.pdf [file emermed-2020-210628supp003.pdf]

## SUPPLEMENTARY FILE 3

**Adjusted Odds Ratios (AORs) for the association between In-hospital mortality and vital signs by different age groups in a subgroup analyses: suspected infection.**

**Case definition:** Patients with suspected infection were selected if blood cultures were obtained in the ED, and if patients were hospitalized.

|                                            | Total cohort     | 18-65            | 66-80            | >80              |
|--------------------------------------------|------------------|------------------|------------------|------------------|
| <b>Systolic blood pressure (mmHg)</b>      |                  |                  |                  |                  |
| >140*                                      | 1.00             |                  |                  |                  |
| 121-140                                    | 1.01 (0.79-1.28) | .97 (0.53-1.77)  | 1.08 (0.75-1.54) | 0.96 (0.65-1.41) |
| 101-120                                    | 1.56 (1.24-1.96) | 1.74 (1.02-2.98) | 1.63 (1.15-2.33) | 1.41 (0.96-2.06) |
| 81-100                                     | 1.85 (1.42-2.40) | 1.39 (0.74-2.63) | 2.49 (1.68-3.68) | 1.64 (1.05-2.57) |
| 0-80                                       | 2.58 (1.88-3.56) | 3.55 (1.82-6.93) | 2.62 (1.55-4.42) | 2.08 (1.17-3.69) |
| <b>Diastolic blood pressure (mmHg)</b>     |                  |                  |                  |                  |
| >120*                                      | 1.00             |                  |                  |                  |
| 101-120                                    | 0.60 (0.36-1.03) | 1.21 (0.40-3.60) | 0.50 (0.23-1.10) | 0.40 (0.15-1.09) |
| 81-100                                     | 0.68 (0.43-1.08) | 0.68 (0.25-1.91) | 0.54 (0.28-1.04) | 0.89 (0.39-2.00) |
| 61-80                                      | 0.64 (0.41-1.01) | 0.91 (0.33-2.49) | 0.50 (0.26-0.96) | 0.71 (0.32-1.59) |
| 0-60                                       | 1.00 (0.64-1.58) | 1.59 (0.57-4.44) | 0.91 (0.47-1.76) | 0.89 (0.40-2.00) |
| <b>Mean Arterial blood pressure (mmHg)</b> |                  |                  |                  |                  |
| >120*                                      | 1.00             |                  |                  |                  |
| 101-120                                    | 0.86 (0.63-1.18) | 1.02 (0.48-2.16) | 0.79 (0.49-1.26) | 0.85 (0.50-1.45) |
| 81-100                                     | 0.89 (0.66-1.19) | 1.12 (0.56-2.27) | 0.71 (0.45-1.11) | 0.98 (0.60-1.62) |
| 61-80                                      | 1.22 (0.90-1.67) | 1.33 (0.64-2.77) | 1.35 (0.86-2.14) | 1.07 (0.63-1.83) |
| 0-60                                       | 2.22 (1.52-3.23) | 3.23(1.38-7.58)  | 2.34 (1.31-4.17) | 1.75 (0.92-3.33) |
| <b>Peripheral oxygen saturation (%)</b>    |                  |                  |                  |                  |
| 96-100*                                    | 1.00             |                  |                  |                  |
| 91-95                                      | 1.09 (0.91-1.31) | 1.15 (0.76-1.75) | 1.08 (0.82-1.42) | 1.01 (0.74-1.36) |
| 86-90                                      | 1.37 (1.04-1.81) | 1.55 (0.79-3.05) | 1.43 (0.96-2.12) | 1.18 (0.72-1.94) |
| 81-85                                      | 2.01 (1.32-3.07) | 1.10 (0.38-3.22) | 2.40 (1.26-4.59) | 2.09 (1.03-4.24) |
| 0-80                                       | 3.24 (2.13-4.86) | 2.80 (1.21-6.45) | 3.78 (2.02-7.09) | 2.58 (1.25-5.35) |
| <b>Respiratory rate (/min)</b>             |                  |                  |                  |                  |
| Not measured*                              | 1.00             |                  |                  |                  |
| 0-9                                        | #                | #                | #                | #                |
| 10-19                                      | 1.08 (0.78-1.49) | 1.19 (0.61-2.33) | 0.95 (0.59-1.54) | 1.11 (0.60-2.05) |
| 20-29                                      | 1.66 (1.20-2.27) | 2.20 (1.13-4.31) | 1.48 (0.93-2.34) | 1.52 (0.84-2.76) |
| >30                                        | 2.45 (1.70-3.51) | 3.86 (1.73-8.60) | 2.61 (1.54-4.43) | 1.88 (0.98-3.62) |
| <b>Heart rate (beats/min)</b>              |                  |                  |                  |                  |
| >125                                       | 2.63 (1.88-3.68) | 4.03 (1.88-8.66) | 1.70 (0.99-2.93) | 2.99 (1.70-5.26) |
| 101-125                                    | 1.78 (1.34-2.37) | 1.59 (0.76-3.33) | 1.68 (1.09-2.60) | 2.05 (1.29-3.28) |
| 76-100                                     | 1.33 (1.01-1.74) | 1.55 (0.76-3.14) | 1.13 (0.75-1.72) | 1.57 (1.02-2.43) |
| 51-75*                                     | 1.00             |                  |                  |                  |
| 0-50                                       | 1.64 (0.89-2.99) | 3.52 (0.83-15.0) | 1.12 (0.40-3.17) | 2.12 (0.84-5.31) |
| <b>Temperature (°C)</b>                    |                  |                  |                  |                  |
| Not measured*                              | 1.00             |                  |                  |                  |
| ≥40                                        | 0.41 (0.23-0.75) | 0.35 (0.10-1.25) | 0.35 (0.13-0.95) | 0.53 (0.20-1.38) |
| 38-39                                      | 0.52 (0.39-0.68) | 0.59 (0.31-1.11) | 0.54 (0.36-0.80) | 0.41 (0.26-0.65) |
| 35-37                                      | 1.14 (0.88-1.48) | 1.50 (0.82-2.72) | 1.01 (0.69-1.49) | 1.09 (0.70-1.71) |
| 31-34                                      | 2.59 (1.50-4.46) | 5.97 (2.18-16.4) | 1.28 (0.47-3.51) | 2.41 (0.95-6.15) |
| 0-30                                       | 0.70 (0.08-6.26) | #                | #                | #                |

\*= reference category

# No outcome events for this category
