# Supplementary material for: The association between vital signs and clinical outcomes in emergency department patients of different age categories
Source: PubMed Central journal article supplement — Emerg Med J. 2022 Jan 11;39(12):903–11. doi: 10.1136/emermed-2020-210628 (PMC9691829; doi:10.1136/emermed-2020-210628), 2022-01-11
Supplement: emermed-2020-210628supp004.pdf [file emermed-2020-210628supp004.pdf]

## SUPPLEMENTARY FILE 4

### **Adjusted Odds Ratios (AORs) for the association between In-hospital mortality and vital signs in a subgroup analyses: Trauma.**

**Case definition:** Trauma patients were selected by hospitalized patients, triaged orange or red and by the following triage presenting complaints: Severe trauma; facial complaints; fall; extremity complaints; large scale incidents; neck pain; thorax injury; head injury; wounds. Additionally, a radiological test had to be performed.

|                                            | Total cohort      |
|--------------------------------------------|-------------------|
| <b>Systolic blood pressure (mmHg)</b>      |                   |
| >140*                                      | 1.00              |
| 121-140                                    | 1.18 (0.73-1.94)  |
| 101-120                                    | 1.31 (0.75-2.30)  |
| 81-100                                     | 1.64 (0.79-3.41)  |
| 0-80                                       | 1.72 (0.67-4.40)  |
| <b>Diastolic blood pressure (mmHg)</b>     |                   |
| >120*                                      | 1.00              |
| 101-120                                    | 0.80 (0.29-2.23)  |
| 81-100                                     | 0.35 (0.13-0.91)  |
| 61-80                                      | 0.46 (0.18-1.20)  |
| 0-60                                       | 0.72 (0.26-2.01)  |
| <b>Mean Arterial blood pressure (mmHg)</b> |                   |
| >120*                                      | 1.00              |
| 101-120                                    | 0.50 (0.30-0.85)  |
| 81-100                                     | 0.56 (0.33-0.95)  |
| 61-80                                      | 1.13 (0.63-2.04)  |
| 0-60                                       | 1.70 (0.64-4.50)  |
| <b>Peripheral oxygen saturation (%)</b>    |                   |
| 96-100*                                    | 1.00              |
| 91-95                                      | 1.87 (1.24-2.82)  |
| 86-90                                      | 5.75 (3.14-10.52) |
| 81-85                                      | 6.88 (2.61-18.12) |
| 0-80                                       | 4.59 (1.55-13.57) |
| <b>Respiratory rate (/min)</b>             |                   |
| Not measured*                              | 1.00              |
| 0-9                                        | #                 |
| 10-19                                      | 1.95 (1.04-3.65)  |
| 20-29                                      | 2.28 (1.16-4.48)  |
| >30                                        | 4.55 (1.35-15.31) |
| <b>Heart rate (beats/min)</b>              |                   |
| >125                                       | 4.22 (1.76-10.1)  |
| 101-125                                    | 2.49 (1.43-4.33)  |
| 76-100                                     | 1.03 (0.66-1.59)  |
| 51-75*                                     | 1.00              |
| 0-50                                       | 2.05 (0.74-5.68)  |
| <b>Temperature (°C)</b>                    |                   |
| Not measured*                              | 1.00              |
| ≥40                                        | #                 |
| 38-39                                      | 1.16 (0.42-3.19)  |
| 35-37                                      | 1.20 (0.78-1.85)  |
| 31-34                                      | 4.84 (1.13-20.75) |
| 0-30                                       | 0.74 (0.04-15.27) |

\*= reference category

# No outcome events for this category
