# Supplementary material for: The association between vital signs and clinical outcomes in emergency department patients of different age categories
Source: PubMed Central journal article supplement — Emerg Med J. 2022 Jan 11;39(12):903–11. doi: 10.1136/emermed-2020-210628 (PMC9691829; doi:10.1136/emermed-2020-210628), 2022-01-11
Supplement: emermed-2020-210628supp007.pdf [file emermed-2020-210628supp007.pdf]

## SUPPLEMENTARY FILE 7

**Sensitivity analyses in which the associations between vital signs and in-hospital mortality were investigated. Patients transferred to other hospitals from the ED were considered as deceased.**

|                                            | Total cohort     |
|--------------------------------------------|------------------|
| <b>Systolic blood pressure (mmHg)</b>      |                  |
| >140*                                      | 1.00             |
| 121-140                                    | 1.14 (1.03-1.26) |
| 101-120                                    | 1.63 (1.47-1.80) |
| 81-100                                     | 1.72 (1.52-1.95) |
| 0-80                                       | 1.98 (1.69-2.32) |
| <b>Diastolic blood pressure (mmHg)</b>     |                  |
| >120*                                      | 1.00             |
| 101-120                                    | 0.73 (0.60-0.90) |
| 81-100                                     | 0.67 (0.56-0.81) |
| 61-80                                      | 0.71 (0.59-0.85) |
| 0-60                                       | 0.97 (0.80-1.17) |
| <b>Mean Arterial blood pressure (mmHg)</b> |                  |
| >120*                                      | 1.00             |
| 101-120                                    | 0.86 (0.77-0.97) |
| 81-100                                     | 0.98 (0.87-1.10) |
| 61-80                                      | 1.22 (1.08-1.39) |
| 0-60                                       | 1.76 (1.46-2.12) |
| <b>Peripheral oxygen saturation (%)</b>    |                  |
| 96-100*                                    | 1.00             |
| 91-95                                      | 1.31 (1.21-1.43) |
| 86-90                                      | 1.92 (1.66-2.23) |
| 81-85                                      | 2.58 (2.06-3.23) |
| 0-80                                       | 3.97 (3.26-4.84) |
| <b>Respiratory rate (/min)</b>             |                  |
| Not measured*                              | 1.00             |
| 0-9                                        | 0.84 (0.50-1.41) |
| 10-19                                      | 1.15 (1.03-1.29) |
| 20-29                                      | 1.60 (1.42-1.81) |
| >30                                        | 2.56 (2.16-3.03) |
| <b>Heart rate (beats/min)</b>              |                  |
| >125                                       | 1.89 (1.61-2.22) |
| 101-125                                    | 1.59 (1.43-1.78) |
| 76-100                                     | 1.12 (1.03-1.22) |
| 51-75*                                     | 1.00             |
| 0-50                                       | 1.27 (1.01-1.60) |
| <b>Temperature (°C)</b>                    |                  |
| Not measured*                              | 1.00             |
| ≥40                                        | 0.38 (0.23-0.60) |
| 38-39                                      | 0.60 (0.52-0.68) |
| 35-37                                      | 0.86 (0.79-0.94) |
| 31-34                                      | 2.05 (1.53-2.75) |
| 0-30                                       | 1.00 (0.36-2.81) |

\* = reference category

# No events for this category

## **SUPPLEMENTARY FILE 7**
