# Supplementary figures and images for: The association between vital signs and clinical outcomes in emergency department patients of different age categories
Source: PubMed Central journal article supplement — Emerg Med J. 2022 Jan 11;39(12):903–11. doi: 10.1136/emermed-2020-210628 (PMC9691829; doi:10.1136/emermed-2020-210628), 2022-01-11

## Supplementary file 5

**Y-axis:**  
AORs on ICU/MCU admission

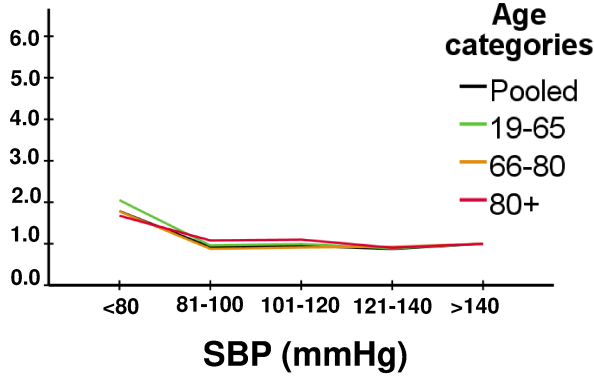

**Y-axis:**  
Predicted ICU/MCU admission

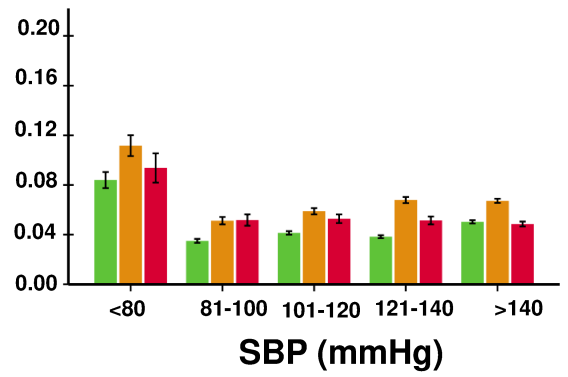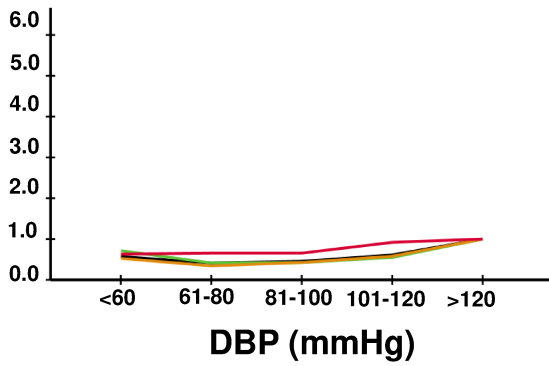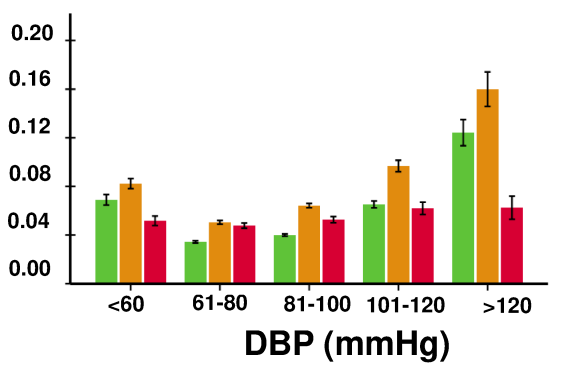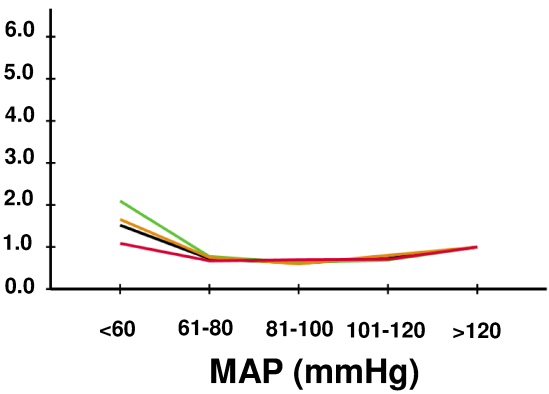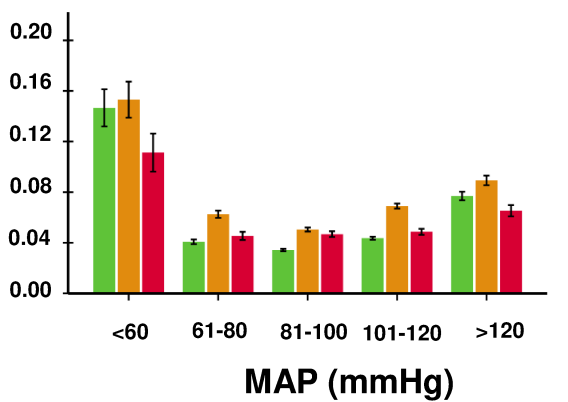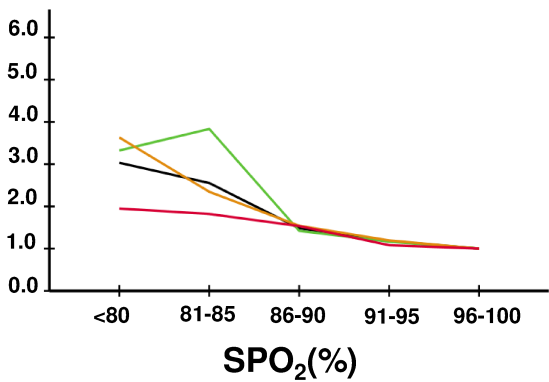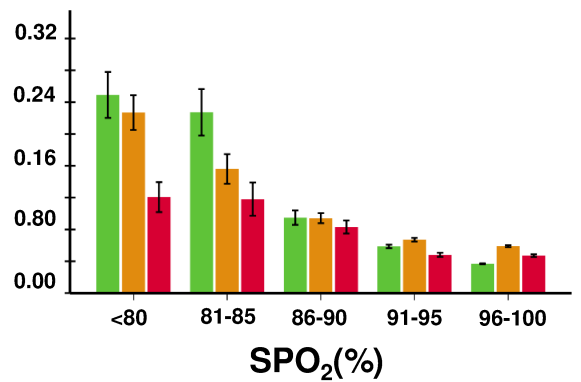

Supplement: emermed-2020-210628supp005.pdf [file emermed-2020-210628supp005.pdf]

## Supplementary file 6

Y-axis:  
AORs on ICU/MCU admission

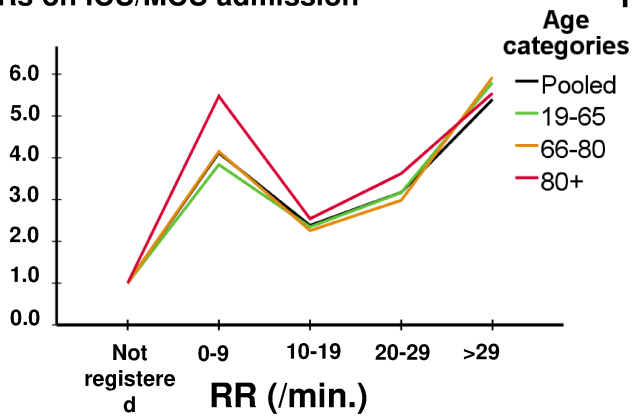

Y-axis:  
Predicted ICU/MCU admission

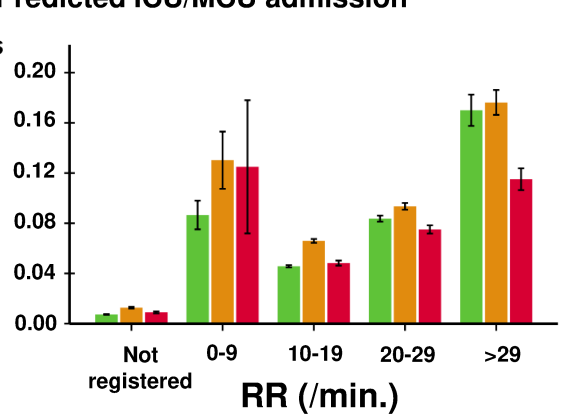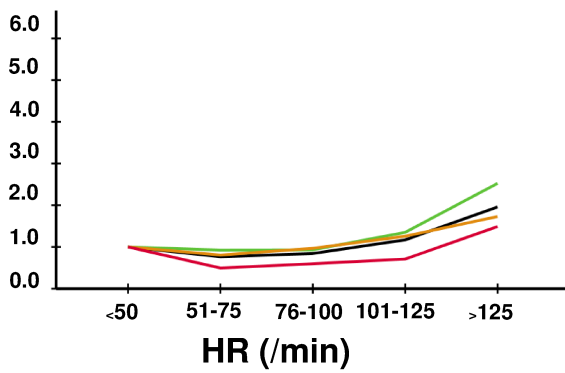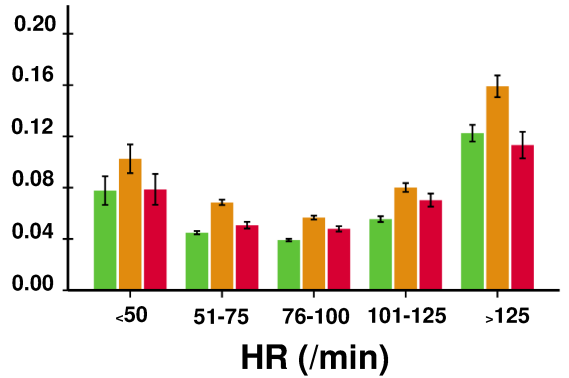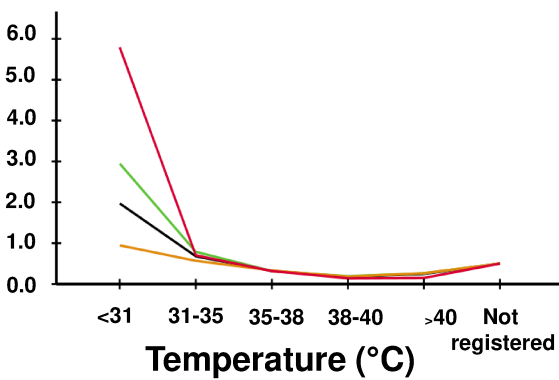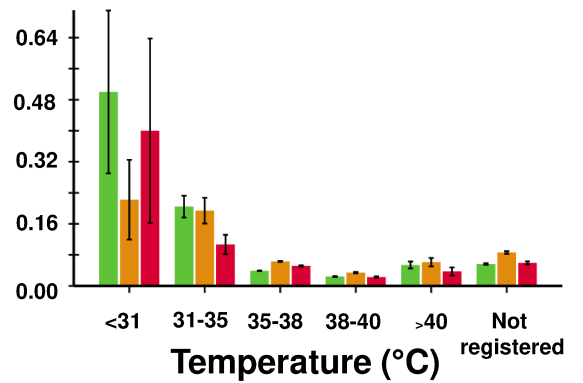

Supplement: emermed-2020-210628supp006.pdf [file emermed-2020-210628supp006.pdf]
